# Supplementary material
Source: Springer Nature journal article supplement (https://springermedizin.de/resource/supplementary/12958_2010_802_MOESM3_ESM.pdf/9568894)

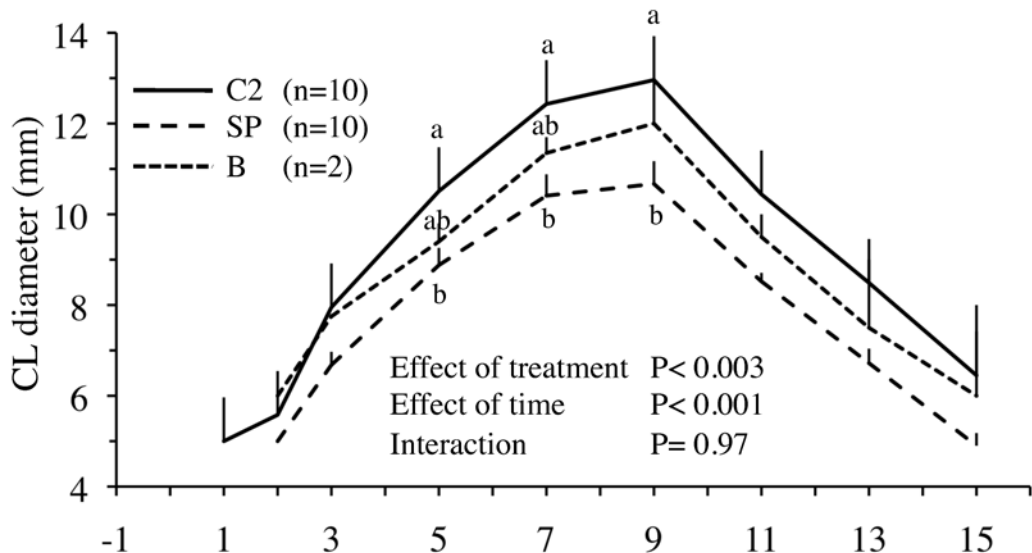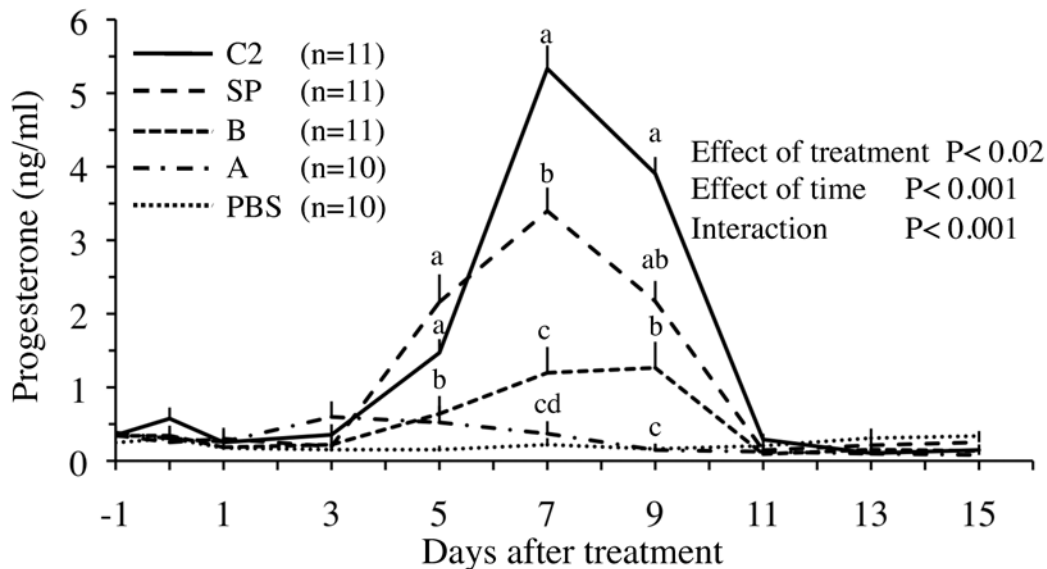

Supplement: MOESM3 [file 9568894]
